# Supplementary material
Source: bioRxiv or medRxiv preprint supplement (https://medrxiv.org/content/medrxiv/early/2021/09/24/2021.09.23.21258047.1/DC1/embed/media-1.pdf)
Supplement: Supplementary file [file media-1.pdf]

**Title: Tracking the temporal variation of COVID-19 surges through wastewater-based epidemiology during the peak of the pandemic: a six-month long study in Charlotte, North Carolina**

Authors: Visva Bharati Barua<sup>a\*</sup>, Md Ariful Islam Juel<sup>a\*</sup>, A. Denene Blackwood<sup>b</sup>, Thomas Clerkin<sup>b</sup>, Mark Ciesielski<sup>b</sup>, Adeola Julian Sorinolu<sup>a</sup>, David A. Holcomb<sup>c</sup>, Isaiah Young<sup>a</sup>, Gina Kimble<sup>d</sup>, Shannon Sypolt<sup>d</sup>, Lawrence S. Engel<sup>c</sup>, Rachel T. Noble<sup>b</sup>, Mariya Munir<sup>a</sup>

<sup>a</sup>Department of Civil and Environmental Engineering, University of North Carolina Charlotte, 9201 University City Boulevard, Charlotte, NC 28223, USA

<sup>b</sup>Institute of Marine Sciences, The University of North Carolina at Chapel Hill, Morehead City, NC 28557, USA

<sup>c</sup>Department of Epidemiology, Gillings School of Global Public Health, The University of North Carolina at Chapel Hill, Chapel Hill, NC 27599, USA

<sup>d</sup>Charlotte Water, 5100 Brookshire Blvd., Charlotte, NC 28216, USA

Corresponding author: [mmunir@uncc.edu](mailto:mmunir@uncc.edu) (Mariya Munir)

\* These authors contributed equally

**Supplementary file**

(a)

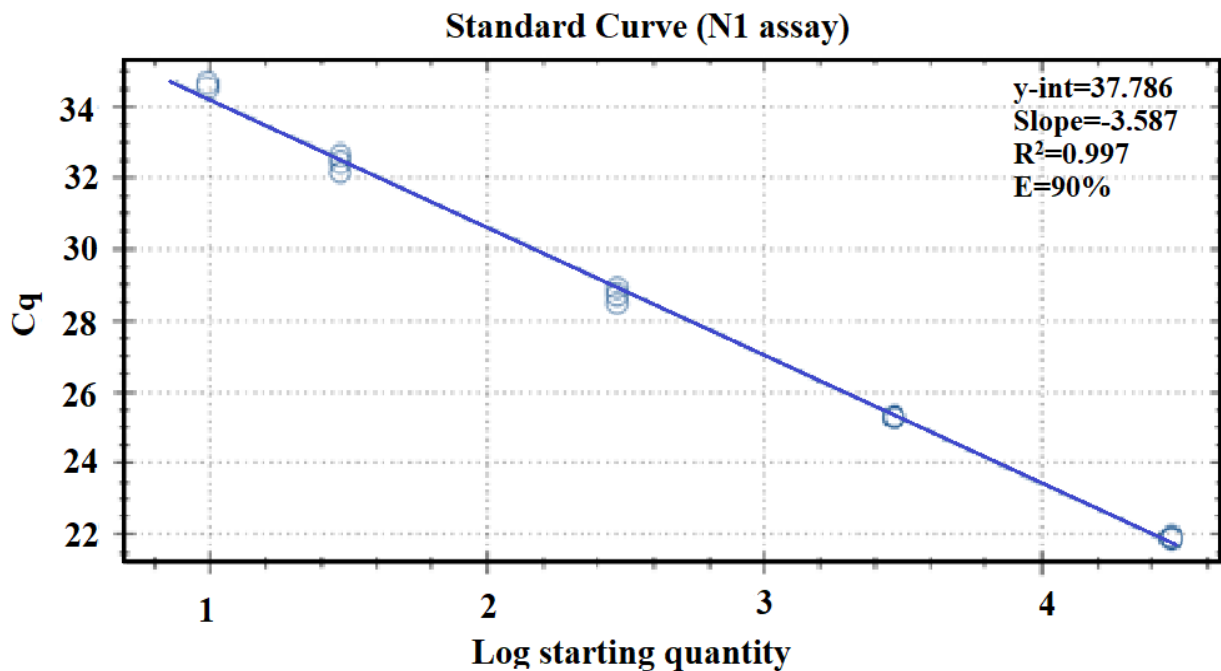

(b)

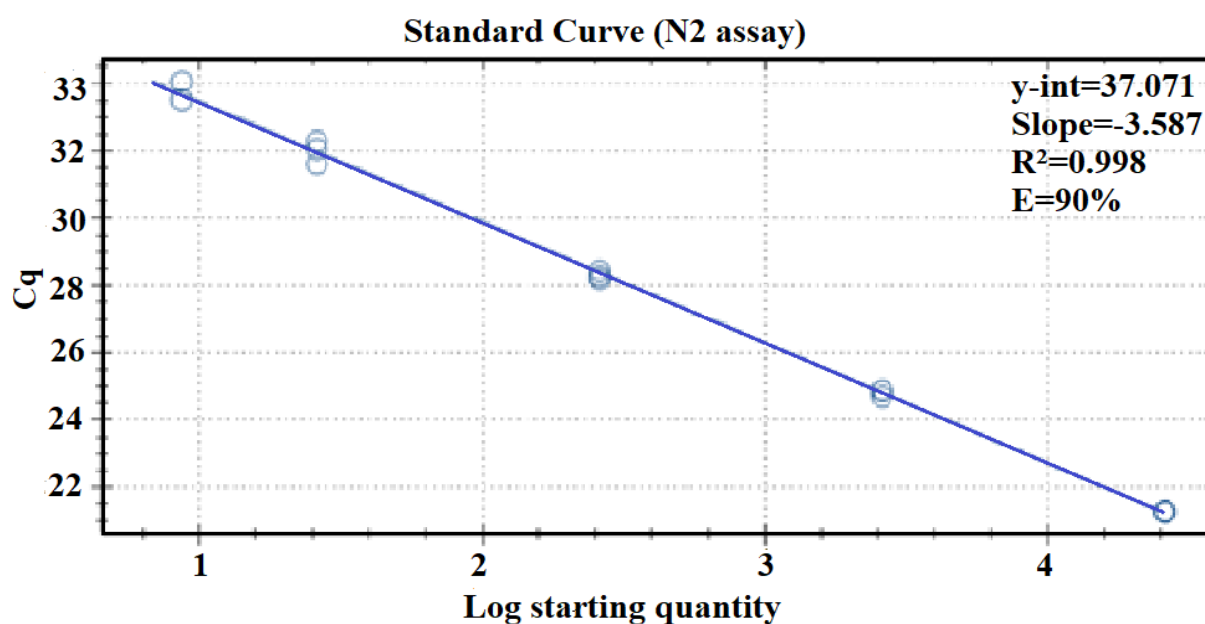

**Fig. S1.** Standard curve for (a) N1 and (b) N2 assay using workflow 1.

**Table S1.** Primers and probe sequences utilized in this WBE study.

| Assay  | Primer/Probe | Sequences                             | Reference                        |
|--------|--------------|---------------------------------------|----------------------------------|
| CDC N1 | Forward      | GACCCCAAATCAGCGAAAT                   | <sup>1</sup> CDC (2020)          |
|        | Reverse      | TCTGGTACTGCCAGTTGAATCTG               |                                  |
|        | Probe        | FAM-ACCCCGCATTACGTTTGGTGGACC-BHQ1     |                                  |
| CDC N2 | Forward      | TTACAAACATTGGCCGCAA                   | <sup>1</sup> CDC (2020)          |
|        | Reverse      | GCGCGACATTCCGAAGAA                    |                                  |
|        | Probe        | FAM-ACAATTTGCCCCCAGCGCTTCAG-BHQ1      |                                  |
| BCoV   | Forward      | CTGGAAGTTGGTGGAGTT                    | <sup>2</sup> Decaro et al., 2008 |
|        | Reverse      | ATTATCGGCCTAACATACATC                 |                                  |
|        | Probe        | FAM-CCTTCATATCTATACACATCAAGTTGTT-BHQ1 |                                  |

|              |         |                                               |                                        |
|--------------|---------|-----------------------------------------------|----------------------------------------|
| <b>Hep G</b> | Forward | CGG CCA AAA GGT GGT GGA TG                    | <sup>3</sup> Schlueter<br>et al., 1996 |
|              | Reverse | CGA CGA GCC TGA CGT CGG G                     |                                        |
|              | Probe   | HEX-AGG TCC CTC TGG CGC TTG TGG<br>CGA G-BHQ1 |                                        |

**Table S2.** Average recovery efficiency of BCoV and HepG for workflow 1

| <b>Workflow 1</b> |                          |                           |
|-------------------|--------------------------|---------------------------|
| <b>Plant</b>      | <b>BCoV recovery (%)</b> | <b>Hep G recovery (%)</b> |
| <b>A</b>          | 21.5±15                  | 41.31±18.1                |
| <b>B</b>          | 22±23                    | 43.4±21                   |
| <b>C</b>          | 20.2±24                  | 38±22.7                   |
| <b>D</b>          | 30.9±29                  | 44±17.4                   |

**Table S3.** Average recovery efficiency of BCoV and HepG for workflow 2

| <b>Workflow 2</b> |                          |                           |
|-------------------|--------------------------|---------------------------|
| <b>Plant</b>      | <b>BCoV recovery (%)</b> | <b>Hep G recovery (%)</b> |
| <b>A</b>          | 24.76±20                 | 26.22±15.5                |
| <b>B</b>          | 22.3±17                  | 17.3±11.5                 |
| <b>C</b>          | 23.3±18                  | 24±13.6                   |
| <b>D</b>          | 26±25                    | 29.8±19.6                 |

**Table S4.** Inhibition control data for N1 gene for workflow 1 (RT-qPCR)

| Date       | Plant | Undiluted |       |       |         | Diluted (1:5) |       |       |         |
|------------|-------|-----------|-------|-------|---------|---------------|-------|-------|---------|
|            |       | Cq        |       |       |         | Cq            |       |       |         |
|            |       | Rep#1     | Rep#2 | Rep#3 | Avg. Cq | Rep#1         | Rep#2 | Rep#3 | Avg. Cq |
| 11/23/2020 | A     | 33.67     | 31.89 | 32.34 | 32.63   | 35.54         | ND    | 36.29 | 35.9    |
|            | B     | 34.24     | 33.37 | 33.92 | 33.77   | ND            | ND    | ND    | NA      |
|            | C     | 34.7      | 32.96 | 34.94 | 34.20   | ND            | ND    | ND    | NA      |
| 11/25/2020 | A     | 33.24     | 33.27 | 33.33 | 33.28   | ND            | ND    | ND    | NA      |
|            | B     | 36.07     | 33.31 | 33.92 | 34.43   | ND            | ND    | ND    | NA      |
|            | C     | 32.00     | 32.54 | 32.01 | 32.18   | 36.85         | ND    | ND    | NA      |
|            | D     | ND        | ND    | ND    | NA      | ND            | ND    | ND    | NA      |
| 11/30/2020 | A     | 32.9      | 32.92 | 32.19 | 32.67   | 36.00         | ND    | ND    | NA      |
|            | B     | 31.87     | 33.3  | 33.07 | 32.74   | ND            | ND    | 35.44 | 35.44   |
|            | C     | 32.33     | 32.1  | 32.24 | 32.22   | 36.24         | ND    | ND    | 36.24   |
| Date       | Plant | Undiluted |       |       |         | Diluted (1:3) |       |       |         |
|            |       | Cq        |       |       |         | Cq            |       |       |         |
|            |       | Rep#1     | Rep#2 | Rep#3 | Avg. Cq | Rep#1         | Rep#2 | Rep#3 | Avg. Cq |
| 7/1/2020   | A     | 33.93     | 32.92 | -     | 33.42   | 33.87         | 35.55 | 35.87 | 35.10   |
|            | B     | ND        | ND    | -     | NA      | ND            | ND    | ND    | NA      |
|            | C     | 34.17     | 35.16 | -     | 34.66   | 34.41         | 36.47 | ND    | 35.44   |
|            | D     | 34.61     | 32.52 | -     | 33.57   | 33.19         | ND    | 34.74 | 33.97   |
| 7/8/2020   | B     | 37.81     | 35.45 | -     | 36.63   | 37.80         | ND    | ND    | 37.63   |
|            | C     | 36.22     | 34.36 | -     | 35.29   | ND            | 35.97 | ND    | 35.97   |

|           |   |       |       |   |       |       |       |       |       |
|-----------|---|-------|-------|---|-------|-------|-------|-------|-------|
|           | D | ND    | ND    | - | NA    | ND    | ND    | ND    | NA    |
| 7/22/2020 | A | 33.07 | 32.10 | - | 32.59 | ND    | 33.01 | 34.02 | 34.81 |
|           | B | 36.83 | 36.12 | - | 36.47 | ND    | ND    | ND    | NA    |
|           | C | 37.21 | 32.47 | - | 34.84 | ND    | 35.28 | ND    | 35.28 |
|           | D | 37.05 | 34.71 | - | 35.88 | ND    | ND    | ND    | NA    |
| 7/29/2020 | A | ND    | ND    | - | NA    | ND    | ND    | ND    | NA    |
|           | B | 33.73 | ND    | - | NA    | ND    | ND    | ND    | NA    |
|           | C | 35.12 | 33.69 | - | 34.41 | 35.96 | ND    | ND    | 35.96 |
|           | D | ND    | ND    | - | NA    | 35.36 | 35.29 | 33.94 | 34.86 |

**Table S5.** Inhibition control data for N2 gene for workflow 2 (ddPCR)

| Date      | Plant | Undiluted |       |       |         | Diluted (1:3) |       |       |         |
|-----------|-------|-----------|-------|-------|---------|---------------|-------|-------|---------|
|           |       | Cq        |       |       |         | Cq            |       |       |         |
|           |       | Rep#1     | Rep#2 | Rep#3 | Avg. Cq | Rep#1         | Rep#2 | Rep#3 | Avg. Cq |
| 7/1/2020  | A     | 35.23     | 34.22 | 37.43 | 35.63   | 35.29         | 34.76 | ND    | 35.03   |
|           | B     | ND        | ND    | ND    | NA      | ND            | ND    | ND    | NA      |
|           | C     | ND        | 37.15 | 36.06 | 36      | 34.61         | ND    | 37.33 | 35.97   |
|           | D     | ND        | 41.17 | 39.34 | 40.25   | 35.53         | ND    | 33.85 | 34.69   |
| 7/8/2020  | B     | ND        | ND    | ND    | NA      | ND            | ND    | ND    | NA      |
|           | C     | ND        | ND    | 35.39 | 35.39   | ND            | ND    | ND    | NA      |
|           | D     | ND        | ND    | ND    | NA      | ND            | ND    | ND    | NA      |
| 7/22/2020 | A     | 33.60     | 33.79 | 34.33 | 35.91   | ND            | 35.94 | ND    | 35.94   |
|           | B     | ND        | ND    | ND    | NA      | ND            | ND    | ND    | NA      |
|           | C     | 33.97     | 36.93 | 34.29 | 35.06   | ND            | 35.94 | ND    | 35.94   |

|           |   |       |       |       |       |       |       |       |       |
|-----------|---|-------|-------|-------|-------|-------|-------|-------|-------|
|           | D | ND    | ND    | ND    | NA    | ND    | 36.74 | ND    | 36.74 |
| 7/29/2020 | A | 36.75 | ND    | ND    | 36.75 | ND    | ND    | ND    | NA    |
|           | B | ND    | ND    | ND    | NA    | ND    | ND    | 39.80 | 39.80 |
|           | C | 36.46 | 34.16 | 36.52 | 35.71 | ND    | ND    | 36.43 | 36.43 |
|           | D | ND    | ND    | ND    | NA    | 37.93 | ND    | ND    | NA    |

| Date      | Plant | Undiluted |    |         |    | Diluted (1:2) |    |         |    |
|-----------|-------|-----------|----|---------|----|---------------|----|---------|----|
|           |       | Cq        |    | Avg. Cq |    | Cq            |    | Avg. Cq |    |
| 7/15/2020 | A     | ND        | ND | ND      | NA | ND            | ND | ND      | NA |
|           | C     | ND        | ND | ND      | NA | ND            | ND | ND      | NA |
| 8/19/2020 | C     | ND        | ND | ND      | NA | ND            | ND | ND      | NA |
|           | D     | ND        | ND | ND      | NA | ND            | ND | ND      | NA |
| 8/26/2020 | A     | ND        | ND | ND      | NA | ND            | ND | ND      | NA |
|           | B     | ND        | ND | ND      | NA | ND            | ND | ND      | NA |
|           | C     | ND        | ND | ND      | NA | ND            | ND | ND      | NA |
| 9/23/2020 | A     | ND        | ND | ND      | NA | ND            | ND | ND      | NA |
|           | B     | ND        | ND | ND      | NA | ND            | ND | ND      | NA |
|           | C     | ND        | ND | ND      | NA | ND            | ND | ND      | NA |
|           | D     | ND        | ND | ND      | NA | ND            | ND | ND      | NA |
| 9/30/2020 | C     | ND        | ND | ND      | NA | ND            | ND | ND      | NA |
| 10/7/2020 | A     | ND        | ND | ND      | NA | ND            | ND | ND      | NA |
|           | B     | ND        | ND | ND      | NA | ND            | ND | ND      | NA |
|           | C     | ND        | ND | ND      | NA | ND            | ND | ND      | NA |
|           | D     | ND        | ND | ND      | NA | ND            | ND | ND      | NA |

|            |   |    |    |    |    |       |       |       |       |
|------------|---|----|----|----|----|-------|-------|-------|-------|
| 11/23/2020 | A | ND | ND | ND | NA | 33.22 | 33.65 | ND    | 33.44 |
|            | B | ND | ND | ND | NA | 35.55 | 34.52 | 34.04 | 34.70 |
|            | C | ND | ND | ND | NA | 33.51 | 33.41 | ND    | 33.46 |
| 11/25/2020 | A | ND | ND | ND | NA | 34.26 | 33.78 | 33.9  | 33.98 |
|            | B | ND | ND | ND | NA | ND    | 35.16 | 35.67 | 35.42 |
|            | C | ND | ND | ND | NA | 33.69 | 34.13 | 33.38 | 33.73 |
|            | D | ND | ND | ND | NA | ND    | ND    | ND    | NA    |
| 11/30/2020 | A | ND | ND | ND | NA | ND    | 33.66 | 33.5  | 33.58 |
|            | B | ND | ND | ND | NA | 33.78 | 33.74 | ND    | 33.76 |
|            | C | ND | ND | ND | NA | ND    | 33.16 | 33.97 | 33.57 |
| 12/2/2020  | A | ND | ND | ND | NA | 31.37 | 31.21 | 32.03 | 31.54 |
|            | B | ND | ND | ND | NA | 32.93 | 33.51 | 33.01 | 33.15 |
|            | C | ND | ND | ND | NA | 33.64 | 33.1  | ND    | 33.37 |
|            | D | ND | ND | ND | NA | ND    | ND    | ND    | NA    |
| 12/7/2020  | A | ND | ND | ND | NA | 32.69 | 33.15 | 32.96 | 32.93 |
|            | B | ND | ND | ND | NA | 34.18 | 33.82 | ND    | 34    |
|            | C | ND | ND | ND | NA | ND    | 33.18 | 35.03 | 34.12 |

- Not detected; NA- Not applicable

**Table S6.** Inhibiton control data for workflow 2 (ddPCR)

| <b>Date</b> | <b>Inhibition efficiency (%)</b> |                |                |                |
|-------------|----------------------------------|----------------|----------------|----------------|
|             | <b>Plant A</b>                   | <b>Plant B</b> | <b>Plant C</b> | <b>Plant D</b> |
| 6/24/2020   | 101                              | 101            | 100            | -              |
| 7/1/2020    | 101                              | 101            | 104            | 99             |
| 7/8/2020    | 96                               | 104            | 98             | 101            |
| 7/15/2020   | 102                              | 98             | 100            | 97             |
| 7/22/2020   | 99                               | 98             | 103            | 99             |
| 7/29/2020   | 98                               | 99             | 97             | 98             |
| 8/5/2020    | 94                               | 98             | NT             | 98             |
| 8/12/2020   | 100                              | 98             | 100            | 97             |
| 8/19/2020   | 101                              | 98             | 97             | 102            |
| 8/26/2020   | 97                               | 100            | 99             | 97             |
| 9/2/2020    | 97                               | 96             | 99             | 94             |
| 9/9/2020    | 95                               | 92             | -              | 98             |
| 9/15/2020   | -                                | 98             | 89             | -              |
| 9/30/2020   | 98                               | 97             | 94             | 91             |
| 10/7/2020   | 96                               | 90             | 94             | 95             |
| 10/14/2020  | 98                               | 95             | 94             | 97             |



|            |     |     |     |    |
|------------|-----|-----|-----|----|
| 10/28/2020 | 96  | 95  | 101 | 93 |
| 11/2/2020  | 98  | 105 | 100 | -  |
| 11/4/2020  | 96  | 93  | -   | -  |
| 11/11/2020 | 93  | 94  | 101 | 96 |
| 11/16/2020 | 93  | 100 | 94  | -  |
| 11/18/2020 | 95  | 93  | 97  | -  |
| 11/23/2020 | 97  | 97  | 96  | -  |
| 11/25/2020 | 94  | 93  | 94  | 96 |
| 11/30/2020 | 96  | 101 | 97  | -  |
| 12/7/2020  | 101 | 96  | 94  | -  |
| 12/9/2020  | 90  | 95  | 95  | 91 |
| 12/14/2020 | -   | 95  | 91  | -  |

**Table S7a.** Detailed reagents and methods utilized in workflow 2

| <b>Kingfisher Magnetic bead extraction</b> |                    |                   |                       |
|--------------------------------------------|--------------------|-------------------|-----------------------|
| <b>Quantity</b>                            | <b>Description</b> | <b>Vendor</b>     | <b>Catalog Number</b> |
| 1                                          | Tip comb           | Fisher Sci.       | 22-387-029            |
| 7                                          | 96 well, DWP       | Fisher Sci.       | 22-387-031            |
| 800 $\mu$ L                                | Wash Buffer 1      | Biomerieux        | 280130                |
| 1000 $\mu$ L                               | Wash Buffer 2      | Biomerieux        | 280131                |
| 500 $\mu$ L                                | Wash Buffer 3      | Biomerieux        | 280132                |
| 50 $\mu$ L                                 | Magnetic silica    | Biomerieux        | 280134                |
| 100 $\mu$ L                                | Buffer AE          | Life Technologies | 19077                 |

**Extraction protocol for workflow 2**

***Lysate Plate***

- Dispense up to 950  $\mu$ L of supernatant of lysed sample into a 96 Deep Well plate containing 50 mL of magnetic beads.
- Incubate 96 well Deep Well plate containing sample and Magnetic Beads for 10 minutes at room temperature.
- While incubating, set up other plates.

***Wash 1 Plate***

- Dispense 400  $\mu$ L of Wash Buffer 1 into each well

***Wash 2 Plate***

- Dispense 400  $\mu$ L of Wash Buffer 1 into each well

***Wash 3 Plate***

- Dispense 500  $\mu$ L of Wash Buffer 2 into each well

***Wash 4 Plate***

- Dispense 500  $\mu$ L of Wash Buffer 2 into each well

***Wash 5 Plate***

- Dispense 500  $\mu$ L of Wash Buffer 3 into each well

***Eluate Plate***

- Dispense 100  $\mu$ L of AE Elution Buffer into each well

***Tip Comb Plate***

- Place 96 DW tip comb into plate

After 10-minutes of incubation, plates were added to the Kingfisher Instrument as the program directed.

**Table S7b.** Sample preparation for Reverse Transcription

| <b>Quantity</b> | <b>Description</b>     | <b>Vendor</b> | <b>Catalog Number</b> |
|-----------------|------------------------|---------------|-----------------------|
| 50 $\mu$ L      | Superscript VILO IV MM | Fisher Sci.   | 11756050              |
| 1               | Foil seal              | BioRad        | 1814040               |
| 1               | 96 well PCR plate      | BioRad        | 12001925              |
| 1 $\mu$ L       | Mouse Lung RNA         | BioChain      | R1334152-50           |

| <b>RT MasterMIX</b>    | <b><math>\mu</math>L</b> |
|------------------------|--------------------------|
| Volume per rxn         | 70                       |
| Superscript IV VILO 5X | 14                       |
| RNA template           | 35                       |
| Mouse Lung RNA         | 1                        |
| Water                  | 20                       |

## References

- (1) CDC, (2020). (<https://www.cdc.gov/healthywater/surveillance/wastewater-surveillance/testing-methods.html>)
- (2) Decaro, N.; Elia, G.; Campolo, M.; Desario, C.; Mari, V.; Radogna, A.; Colaianni, M. L.; Cirone, F.; Tempesta, M.; Buonavoglia, C. Detection of Bovine Coronavirus Using a TaqMan-Based Real-Time RT-PCR Assay. *J. Virol. Methods* 2008, *151* (2), 167–171. <https://doi.org/10.1016/j.jviromet.2008.05.016>.
- (3) Schlueter, V.; Schmolke, S.; Stark, K.; Hess, G.; Ofenloch-Haehnle, B.; Engel, A. M. Reverse Transcription-PCR Detection of Hepatitis G Virus. *J. Clin. Microbiol.* 1996, *34* (11), 2660–2664. <https://doi.org/10.1128/jcm.34.11.2660-2664.1996>.
